# Supplementary material for: The origins and development of speech envelope tracking during the first months of life
Source: PubMed Central journal article supplement — Dev Cogn Neurosci. 2021 Jan 20;48:100915. doi: 10.1016/j.dcn.2021.100915 (PMC7847966; doi:10.1016/j.dcn.2021.100915), 2021-01-20
Supplement: mmc1.pdf [file mmc1.pdf]

Supplementary Information for

**The origins and development of speech envelope tracking during the first months of life**

Maria Clemencia Ortiz Barajas\*, Ramón Guevara, Judit Gervain

\* Corresponding author: Maria Clemencia Ortiz Barajas

Email: clema\_ob@yahoo.com

**This PDF file includes:**

Figures S1 to S3

Tables S1 to S13

SI References

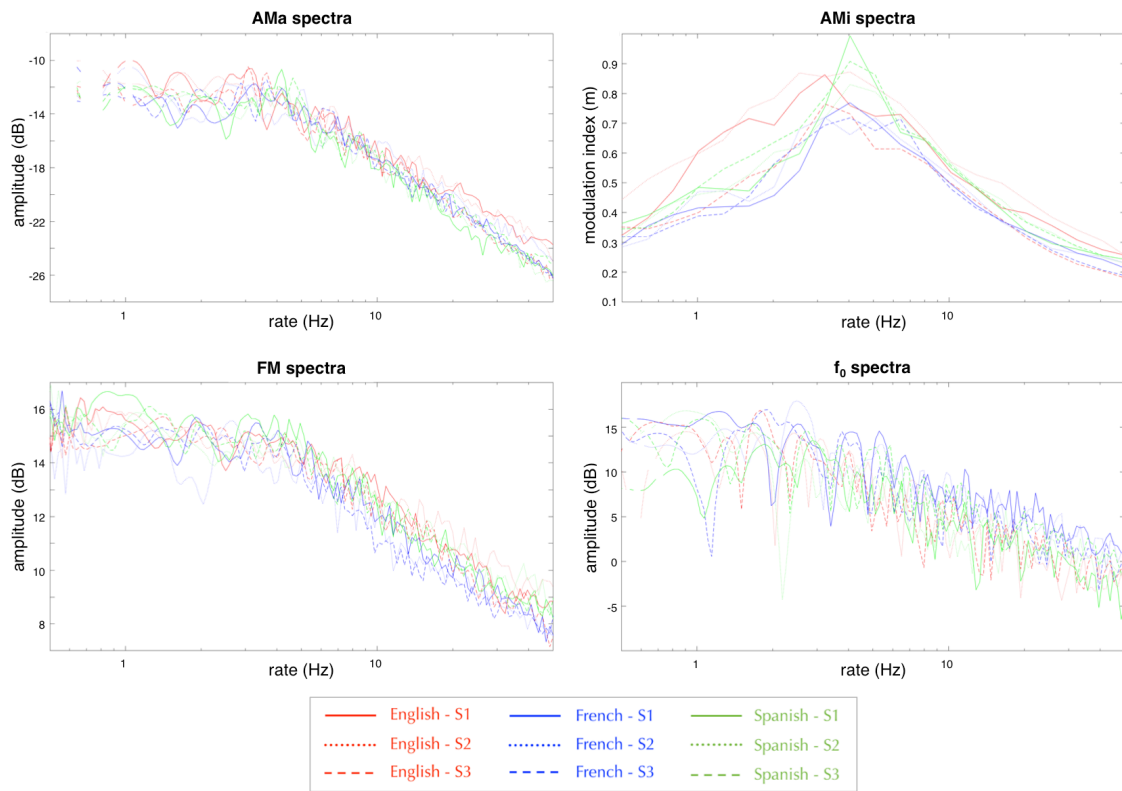

**Figure. S1.** Amplitude and frequency modulation spectra for the 9 utterances used as stimuli. Red lines: English utterances; blue lines: French utterances; green lines: Spanish utterances. These modulation spectra were obtained following the methodology described by Varnet et al., 2017.

## Cross-correlation functions - Newborns

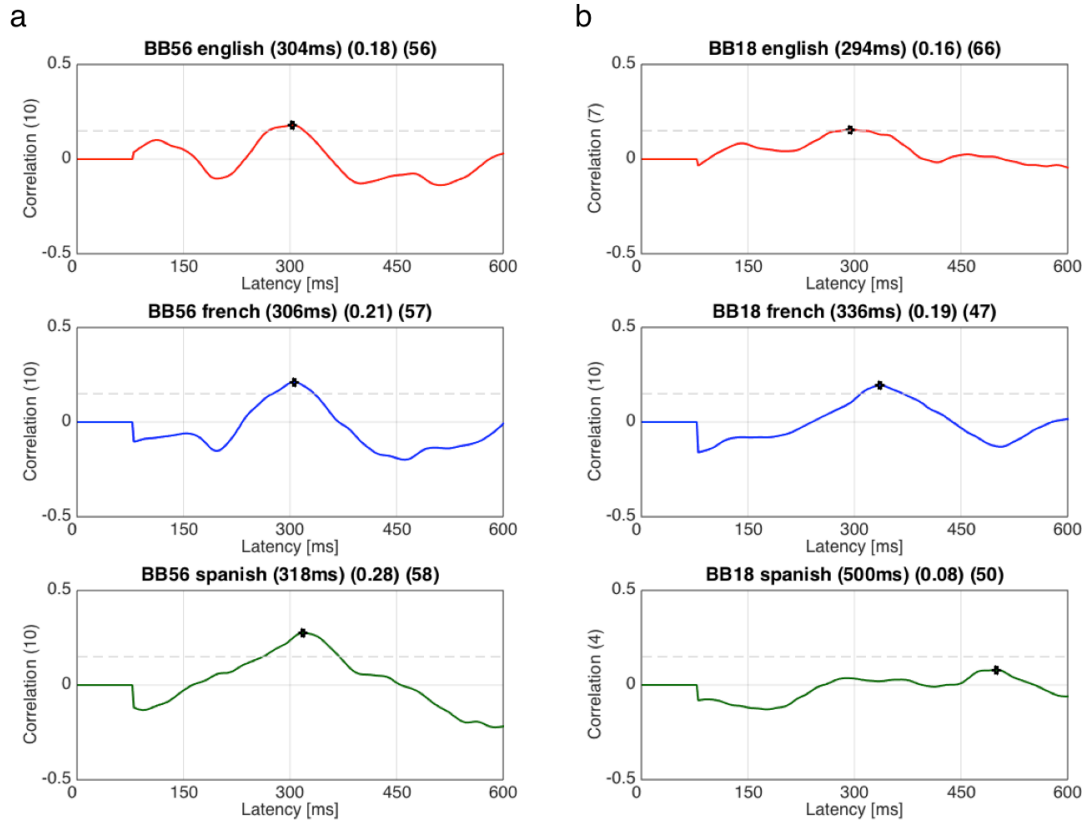

**Figure. S2.** Mean cross-correlation functions for two newborn participants. These mean functions were obtained for each language by averaging the cross-correlation functions from the channels that were at least weakly correlated ( $\rho > 0.15$ ). (a) The cross-correlation functions for English (red curve), French (blue curve), and Spanish (green curve) for participant BB56 exhibit well defined peaks with correlations  $> 0.15$ . For participant BB56 the cross-correlation functions from the three languages were averaged to obtain a mean time lag. (b) The cross-correlation function for Spanish (green curve) for participant BB18 does not exhibit peaks reaching the minimum correlation threshold ( $\rho = 0.15$ ), therefore it was excluded from the computation of the mean time lag, and only the cross-correlation functions from English and French were averaged to obtain it. The grey dotted horizontal lines corresponds to the  $\rho = 0.15$  threshold. The information in parentheses presented at each plot's title corresponds to the latency of the peak, the correlation at the peak, and the number of non-rejected trials, respectively. The information in parentheses presented next to the Y-axis label (correlation) corresponds to the number of channels included when computing the mean cross-correlation function for each language.

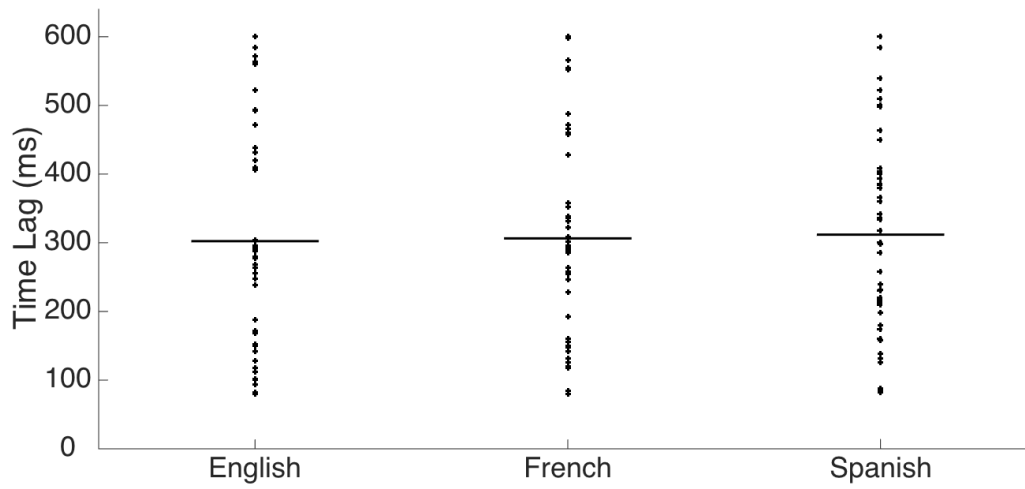

**Figure. S3.** Times lags of amplitude tracking for individual participants for each language, at birth. These values were submitted to a repeated measure ANOVA to test for the effect of language [ $F(2,92) = 0.044, p=0.957$ ].

**Table S1.** Stimulus information.

|                | <b>Set 1</b>                                                                                                                                                                                                       | <b>Set 2</b>                                                                                                                                                                                        | <b>Set 3</b>                                                                                                                                                                                                                   |
|----------------|--------------------------------------------------------------------------------------------------------------------------------------------------------------------------------------------------------------------|-----------------------------------------------------------------------------------------------------------------------------------------------------------------------------------------------------|--------------------------------------------------------------------------------------------------------------------------------------------------------------------------------------------------------------------------------|
| <b>English</b> | <p><i>The bears lived all together in a beautiful house</i></p> <p>Duration: 2,50 s<br/>Syllabic rate: 5 Hz<br/>Pitch_min: 142,5 Hz<br/>Pitch_max: 700,8 Hz<br/>Pitch_range: 558,3 Hz<br/>Pitch_mean: 303,4 Hz</p> | <p>The bears decided to take a walk that day</p> <p>Duration: 2,16 s<br/>Syllabic rate: 5 Hz<br/>Pitch_min: 181,2 Hz<br/>Pitch_max: 400,2 Hz<br/>Pitch_range: 219,0 Hz<br/>Pitch_mean: 261,8 Hz</p> | <p>The little bears saw that their chairs were used by the naughty girl</p> <p>Duration: 2,96 s<br/>Syllabic rate: 4 Hz<br/>Pitch_min: 171,2 Hz<br/>Pitch_max: 735,9 Hz<br/>Pitch_range: 564,7 Hz<br/>Pitch_mean: 322,1 Hz</p> |
| <b>French</b>  | <p>Les ours habitaient tous ensemble dans une maison</p> <p>Duration: 2,66 s<br/>Syllabic rate: 4 Hz<br/>Pitch_min: 195,6 Hz<br/>Pitch_max: 556,5 Hz<br/>Pitch_range: 360,9 Hz<br/>Pitch_mean: 307,6 Hz</p>        | <p>Les ours décidèrent d'aller se promener</p> <p>Duration: 2,17 s<br/>Syllabic rate: 4 Hz<br/>Pitch_min: 99,7 Hz<br/>Pitch_max: 342,3 Hz<br/>Pitch_range: 242,6 Hz<br/>Pitch_mean: 224,7 Hz</p>    | <p>Les ours virent que leurs chaises avaient été utilisées</p> <p>Duration: 2,93 s<br/>Syllabic rate: 6 Hz<br/>Pitch_min: 95,7 Hz<br/>Pitch_max: 263,2 Hz<br/>Pitch_range: 167,5 Hz<br/>Pitch_mean: 190,1 Hz</p>               |
| <b>Spanish</b> | <p>Los osos vivían juntos en una casa</p> <p>Duration: 2,60 s<br/>Syllabic rate: 4 Hz<br/>Pitch_min: 164,4 Hz<br/>Pitch_max: 287,3 Hz<br/>Pitch_range: 122,9 Hz<br/>Pitch_mean: 219,8 Hz</p>                       | <p>Los osos tomaron un gran paseo</p> <p>Duration: 2,19 s<br/>Syllabic rate: 3 Hz<br/>Pitch_min: 178,2 Hz<br/>Pitch_max: 423,5 Hz<br/>Pitch_range: 245,3 Hz<br/>Pitch_mean: 245,9 Hz</p>            | <p>Los osos vieron sus sillas siendo utilizadas</p> <p>Duration: 3,00 s<br/>Syllabic rate: 4 Hz<br/>Pitch_min: 99,0 Hz<br/>Pitch_max: 420,8 Hz<br/>Pitch_range: 321,8 Hz<br/>Pitch_mean: 260,0 Hz</p>                          |

*Note:* Three sets of sentences were used during the study. Each set contained one sentence translated into the three languages. The translations were slightly modified in order to match sentence duration across languages within the same set. The duration, syllabic rate, and pitch details are included for each sentence.

**Table S2.** Group mean correlation values for the measured EEG data at birth.

| Channel | ENGLISH |         |         | FRENCH |         |         | SPANISH |         |         |
|---------|---------|---------|---------|--------|---------|---------|---------|---------|---------|
|         | mean    | p-value | t-value | mean   | p-value | t-value | Mean    | p-value | t-value |
| F7      | 0.121   | 0.00    | 5.118   | 0.121  | 0.00    | 4.627   | 0.120   | 0.00    | 4.453   |
| F3      | 0.116   | 0.00    | 5.520   | 0.123  | 0.00    | 5.025   | 0.147   | 0.00    | 6.096   |
| Fz      | 0.097   | 0.00    | 4.374   | 0.124  | 0.00    | 5.178   | 0.152   | 0.00    | 6.297   |
| F4      | 0.128   | 0.00    | 5.551   | 0.140  | 0.00    | 5.605   | 0.142   | 0.00    | 5.189   |
| F8      | 0.112   | 0.00    | 4.825   | 0.142  | 0.00    | 5.847   | 0.120   | 0.00    | 4.287   |
| T7      | 0.075   | 0.05    | 2.921   | 0.095  | 0.00    | 3.771   | 0.088   | 0.01    | 3.705   |
| C3      | 0.111   | 0.00    | 4.265   | 0.141  | 0.00    | 6.331   | 0.124   | 0.00    | 5.389   |
| Cz      | 0.120   | 0.00    | 5.451   | 0.140  | 0.00    | 5.891   | 0.129   | 0.00    | 5.015   |
| C4      | 0.091   | 0.00    | 4.134   | 0.141  | 0.00    | 6.256   | 0.135   | 0.00    | 5.086   |
| T8      | 0.048   | 0.54    | 1.981   | 0.090  | 0.00    | 3.764   | 0.059   | 0.09    | 2.717   |

*Note:* The correlation distributions were submitted to one-sample t-tests (two-tailed) to compare them to zero. The p-values (Bonferroni corrected) and t-values of these t-tests are presented here per channel. Non-significant results are highlighted in red.

**Table S3.** Group mean correlation values for the permuted data at birth.

| Channel | ENGLISH |           | FRENCH |          | SPANISH |           |
|---------|---------|-----------|--------|----------|---------|-----------|
|         | mean    | p-value   | mean   | p-value  | mean    | p-value   |
| F7      | 0.001   | p < 0.001 | 0.043  | p < 0.05 | 0.003   | p < 0.01  |
| F3      | -0.002  | p < 0.001 | 0.051  | p < 0.05 | 0.011   | p < 0.001 |
| Fz      | 0.006   | p < 0.01  | 0.045  | p < 0.05 | 0.015   | p < 0.001 |
| F4      | -0.016  | p < 0.001 | 0.044  | p < 0.01 | 0.017   | p < 0.01  |
| F8      | -0.014  | p < 0.001 | 0.024  | p < 0.01 | 0.009   | p < 0.01  |
| T7      | 0.009   | p < 0.05  | 0.027  | p > 0.05 | 0.006   | p < 0.05  |
| C3      | 0.009   | p < 0.01  | 0.065  | p < 0.05 | 0.039   | p < 0.05  |
| Cz      | 0.004   | p < 0.001 | 0.057  | p < 0.05 | 0.032   | p < 0.01  |
| C4      | -0.004  | p < 0.01  | 0.058  | p < 0.05 | 0.027   | p < 0.01  |
| T8      | -0.013  | p > 0.05  | 0.026  | p > 0.05 | 0.003   | p > 0.05  |

*Note:* The correlation distributions for the measured EEG data were submitted to paired samples t-tests to compare them to the correlation distributions for the permuted data. The p-values for the permuted data were derived as the number of permutations out of the 1000 whose correlation distributions were not significantly different from the correlation distributions obtained for the measured data. Non-significant results are highlighted in red.

**Table S4.** Linear regression analyses of single trial amplitude tracking results at birth.

|                | Channel | R <sup>2</sup> | Corrected p-value |
|----------------|---------|----------------|-------------------|
| <b>English</b> | F7      | 0.001          | 0.306             |
|                | F3      | 0.001          | 0.318             |
|                | Fz      | 0.002          | 0.270             |
|                | F4      | 0.001          | 0.227             |
|                | F8      | 0.001          | 0.273             |
|                | T7      | 0.001          | 0.361             |
|                | C3      | 0.000          | 0.507             |
|                | Cz      | 0.001          | 0.368             |
|                | C4      | 0.002          | 0.270             |
|                | T8      | 0.000          | 0.432             |
| <b>French</b>  | F7      | 0.000          | 1.000             |
|                | F3      | 0.000          | 1.000             |
|                | Fz      | 0.000          | 1.000             |
|                | F4      | 0.000          | 0.940             |
|                | F8      | 0.000          | 0.928             |
|                | T7      | 0.002          | 0.220             |
|                | C3      | 0.000          | 1.000             |
|                | Cz      | 0.000          | 1.000             |
|                | C4      | 0.000          | 0.888             |
|                | T8      | 0.001          | 0.785             |
| <b>Spanish</b> | F7      | 0.001          | 0.330             |
|                | F3      | 0.000          | 0.540             |
|                | Fz      | 0.000          | 0.929             |
|                | F4      | 0.001          | 0.258             |
|                | F8      | 0.002          | 0.190             |
|                | T7      | 0.001          | 0.297             |
|                | C3      | 0.000          | 0.468             |
|                | Cz      | 0.001          | 0.323             |
|                | C4      | 0.002          | 0.430             |
|                | T8      | 0.002          | 0.215             |

*Note:* The amplitude tracking correlations at the single trial level were submitted to simple linear regression analyses investigating the potential effects of habituation over the trials in each channel for each language. The p-values were subjected to False Discovery Rate correction for multiple comparisons (Benjamini & Hochberg, 1995).



**Table S5.** Group mean phase-coherence values for the measured EEG data at birth.

| Channel | ENGLISH |         |         | FRENCH |         |         | SPANISH |         |         |
|---------|---------|---------|---------|--------|---------|---------|---------|---------|---------|
|         | Mean    | p-value | t-value | mean   | p-value | t-value | Mean    | p-value | t-value |
| F7      | 0.350   | 0.00    | 15.263  | 0.338  | 0.00    | 15.591  | 0.355   | 0.00    | 14.622  |
| F3      | 0.298   | 0.00    | 13.781  | 0.339  | 0.00    | 15.016  | 0.343   | 0.00    | 14.648  |
| Fz      | 0.321   | 0.00    | 13.544  | 0.335  | 0.00    | 14.534  | 0.344   | 0.00    | 15.508  |
| F4      | 0.338   | 0.00    | 15.368  | 0.338  | 0.00    | 14.322  | 0.312   | 0.00    | 12.450  |
| F8      | 0.334   | 0.00    | 12.986  | 0.337  | 0.00    | 14.769  | 0.332   | 0.00    | 13.020  |
| T7      | 0.314   | 0.00    | 13.917  | 0.332  | 0.00    | 13.168  | 0.377   | 0.00    | 14.199  |
| C3      | 0.304   | 0.00    | 12.367  | 0.349  | 0.00    | 13.964  | 0.368   | 0.00    | 16.661  |
| Cz      | 0.302   | 0.00    | 12.700  | 0.302  | 0.00    | 12.169  | 0.342   | 0.00    | 15.117  |
| C4      | 0.337   | 0.00    | 13.274  | 0.309  | 0.00    | 13.979  | 0.321   | 0.00    | 13.106  |
| T8      | 0.292   | 0.00    | 12.120  | 0.327  | 0.00    | 14.882  | 0.337   | 0.00    | 14.188  |

*Note:* The phase-coherence distributions were submitted to one-sample t-tests (two-tailed) to compare them to zero. The p-values (Bonferroni corrected) and t-values of these t-tests are presented here per channel. All channels were significantly higher than zero for the three languages.

**Table S6.** Group mean phase-coherence values for the permuted data at birth.

| Channel | ENGLISH |           | FRENCH |           | SPANISH |           |
|---------|---------|-----------|--------|-----------|---------|-----------|
|         | mean    | p-value   | mean   | p-value   | mean    | p-value   |
| F7      | 0.036   | p < 0.001 | 0.037  | p < 0.001 | 0.036   | p < 0.001 |
| F3      | 0.036   | p < 0.001 | 0.037  | p < 0.001 | 0.035   | p < 0.001 |
| Fz      | 0.036   | p < 0.001 | 0.037  | p < 0.001 | 0.036   | p < 0.001 |
| F4      | 0.036   | p < 0.001 | 0.036  | p < 0.001 | 0.036   | p < 0.001 |
| F8      | 0.036   | p < 0.001 | 0.036  | p < 0.001 | 0.036   | p < 0.001 |
| T7      | 0.035   | p < 0.001 | 0.037  | p < 0.001 | 0.036   | p < 0.001 |
| C3      | 0.035   | p < 0.001 | 0.036  | p < 0.001 | 0.036   | p < 0.001 |
| Cz      | 0.036   | p < 0.001 | 0.037  | p < 0.001 | 0.036   | p < 0.001 |
| C4      | 0.036   | p < 0.001 | 0.036  | p < 0.001 | 0.035   | p < 0.001 |
| T8      | 0.036   | p < 0.001 | 0.036  | p < 0.001 | 0.036   | p < 0.001 |

*Note:* The phase-coherence distributions for the measured EEG data were submitted to paired samples t-tests to compare them to the phase-coherence distributions for the permuted data. The p-values for the permuted data were derived as the number of permutations out of the 1000 whose phase-coherence distributions were not significantly different from those obtained for the measured data. Phase-coherence distributions for the measured data were significantly higher than those for the permuted data for all channels in the three languages.

**Table S7.** Group mean correlation values for the measured EEG data at 6 months.

| Channel | ENGLISH |         |         | FRENCH |         |         | SPANISH |         |         |
|---------|---------|---------|---------|--------|---------|---------|---------|---------|---------|
|         | mean    | p-value | t-value | mean   | p-value | t-value | mean    | p-value | t-value |
| F7      | 0.164   | 0.00    | 6.007   | 0.117  | 0.02    | 3.402   | 0.105   | 0.06    | 3.036   |
| F3      | 0.165   | 0.00    | 5.536   | 0.139  | 0.00    | 4.427   | 0.130   | 0.01    | 3.786   |
| Fz      | 0.186   | 0.00    | 6.519   | 0.120  | 0.01    | 3.744   | 0.106   | 0.02    | 3.505   |
| F4      | 0.189   | 0.00    | 6.752   | 0.133  | 0.00    | 5.286   | 0.097   | 0.12    | 2.728   |
| F8      | 0.152   | 0.00    | 7.627   | 0.108  | 0.02    | 3.378   | 0.103   | 0.12    | 2.704   |
| T7      | 0.140   | 0.00    | 4.442   | 0.082  | 0.03    | 3.264   | 0.068   | 0.69    | 1.902   |
| C3      | 0.186   | 0.00    | 5.421   | 0.119  | 0.00    | 4.662   | 0.089   | 0.14    | 2.655   |
| Cz      | 0.217   | 0.00    | 8.198   | 0.098  | 0.03    | 3.299   | 0.075   | 0.44    | 2.130   |
| C4      | 0.186   | 0.00    | 7.358   | 0.149  | 0.00    | 5.917   | 0.069   | 0.77    | 1.847   |
| T8      | 0.094   | 0.03    | 3.355   | 0.103  | 0.01    | 3.717   | 0.076   | 0.33    | 2.266   |

*Note:* The correlation distributions were submitted to one-sample t-tests (two-tailed) to compare them to zero. The p-values (Bonferroni corrected) and t-values of these t-tests are presented here per channel. Non-significant results are highlighted in red.

**Table S8.** Group mean correlation values for the permuted data at 6 months.

| Channel | ENGLISH |           | FRENCH |          | SPANISH |          |
|---------|---------|-----------|--------|----------|---------|----------|
|         | mean    | p-value   | mean   | p-value  | Mean    | p-value  |
| F7      | 0.002   | p < 0.001 | 0.082  | p > 0.05 | 0.003   | p < 0.05 |
| F3      | -0.002  | p < 0.001 | 0.078  | p > 0.05 | -0.005  | p < 0.01 |
| Fz      | 0.006   | p < 0.001 | 0.061  | p > 0.05 | -0.011  | p < 0.01 |
| F4      | 0.006   | p < 0.001 | 0.083  | p > 0.05 | 0.004   | p > 0.05 |
| F8      | 0.012   | p < 0.001 | 0.087  | p > 0.05 | 0.012   | p > 0.05 |
| T7      | 0.009   | p < 0.01  | 0.081  | p > 0.05 | 0.013   | p > 0.05 |
| C3      | -0.006  | p < 0.001 | 0.091  | p > 0.05 | 0.014   | p > 0.05 |
| Cz      | -0.006  | p < 0.001 | 0.070  | p > 0.05 | -0.009  | p > 0.05 |
| C4      | -0.006  | p < 0.001 | 0.080  | p > 0.05 | 0.004   | p > 0.05 |
| T8      | 0.007   | p < 0.05  | 0.091  | p > 0.05 | 0.032   | p > 0.05 |

*Note:* The correlation distributions for the measured EEG data were submitted to paired samples t-tests to compare them to the correlation distributions for the permuted data. The p-values for the permuted data were derived as the number of permutations out of the 1000 whose correlation distributions were not significantly different from the correlation distributions obtained for the measured data. Non-significant results are highlighted in red.

**Table S9.** Linear regression analyses of single trial amplitude tracking results at 6 months.

|                | <b>Channel</b> | <b>R<sup>2</sup></b> | <b>Corrected p-value</b> |
|----------------|----------------|----------------------|--------------------------|
| <b>English</b> | F7             | 0.000                | 1.000                    |
|                | F3             | 0.000                | 1.000                    |
|                | Fz             | 0.000                | 1.000                    |
|                | F4             | 0.000                | 1.000                    |
|                | F8             | 0.000                | 1.000                    |
|                | T7             | 0.000                | 1.000                    |
|                | C3             | 0.000                | 1.000                    |
|                | Cz             | 0.001                | 1.000                    |
|                | C4             | 0.000                | 1.000                    |
|                | T8             | 0.000                | 0.952                    |
| <b>French</b>  | F7             | 0.004                | 0.440                    |
|                | F3             | 0.000                | 0.963                    |
|                | Fz             | 0.000                | 0.980                    |
|                | F4             | 0.000                | 1.000                    |
|                | F8             | 0.001                | 0.894                    |
|                | T7             | 0.002                | 0.620                    |
|                | C3             | 0.004                | 0.810                    |
|                | Cz             | 0.002                | 0.607                    |
|                | C4             | 0.000                | 1.000                    |
|                | T8             | 0.000                | 0.874                    |
| <b>Spanish</b> | F7             | 0.003                | 1.000                    |
|                | F3             | 0.001                | 0.516                    |
|                | Fz             | 0.002                | 0.657                    |
|                | F4             | 0.003                | 0.655                    |
|                | F8             | 0.001                | 0.587                    |
|                | T7             | 0.001                | 0.638                    |
|                | C3             | 0.001                | 0.742                    |
|                | Cz             | 0.001                | 0.533                    |
|                | C4             | 0.001                | 0.591                    |
|                | T8             | 0.000                | 0.839                    |

*Note:* The amplitude tracking correlations at the single trial level were submitted to simple linear regression analyses investigating the potential effects of habituation over the trials in each channel for each language. The p-values were subjected to False Discovery Rate correction for multiple comparisons (Benjamini & Hochberg, 1995).

**Table S10.** Repeated measures ANOVAs of amplitude tracking results evaluating the effect of block order at 6 months.

| Channel | F-value | Corrected p-value |
|---------|---------|-------------------|
| F7      | 0.920   | 0.579             |
| F3      | 0.618   | 0.603             |
| Fz      | 2.655   | 0.405             |
| F4      | 1.978   | 0.497             |
| F8      | 0.869   | 0.533             |
| T7      | 2.025   | 0.400             |
| C3      | 1.808   | 0.372             |
| Cz      | 5.340   | 0.120             |
| C4      | 1.668   | 0.342             |
| T8      | 0.272   | 0.730             |

*Note:* The amplitude tracking results were classified according to their order of presentation (1<sup>st</sup> block, 2<sup>nd</sup> block, 3<sup>rd</sup> block), and submitted to repeated measures ANOVAs to evaluate whether they varied across blocks in each channel. There were no significant differences across blocks. The p-values were subjected to False Discovery Rate correction for multiple comparisons (Benjamini & Hochberg, 1995).

**Table S11.** Group mean phase-coherence values for the measured EEG data at 6 months.

| Channel | ENGLISH |         |         | FRENCH |         |         | SPANISH |         |         |
|---------|---------|---------|---------|--------|---------|---------|---------|---------|---------|
|         | Mean    | p-value | t-value | mean   | p-value | t-value | mean    | p-value | t-value |
| F7      | 0.276   | 0.00    | 8.392   | 0.253  | 0.00    | 9.326   | 0.243   | 0.00    | 9.793   |
| F3      | 0.308   | 0.00    | 8.559   | 0.280  | 0.00    | 9.822   | 0.273   | 0.00    | 8.893   |
| Fz      | 0.312   | 0.00    | 10.689  | 0.274  | 0.00    | 10.015  | 0.288   | 0.00    | 9.251   |
| F4      | 0.336   | 0.00    | 9.816   | 0.260  | 0.00    | 9.269   | 0.296   | 0.00    | 8.741   |
| F8      | 0.323   | 0.00    | 9.678   | 0.268  | 0.00    | 11.338  | 0.322   | 0.00    | 10.343  |
| T7      | 0.316   | 0.00    | 9.469   | 0.289  | 0.00    | 8.555   | 0.289   | 0.00    | 10.062  |
| C3      | 0.301   | 0.00    | 8.951   | 0.309  | 0.00    | 12.556  | 0.342   | 0.00    | 9.918   |
| Cz      | 0.313   | 0.00    | 10.162  | 0.307  | 0.00    | 9.927   | 0.333   | 0.00    | 12.340  |
| C4      | 0.296   | 0.00    | 8.455   | 0.292  | 0.00    | 9.632   | 0.297   | 0.00    | 9.932   |
| T8      | 0.335   | 0.00    | 8.763   | 0.351  | 0.00    | 11.399  | 0.313   | 0.00    | 8.046   |

*Note:* The phase-coherence distributions were submitted to one-sample t-tests (two-tailed) to compare them to zero. The p-values (Bonferroni corrected) and t-values of these t-tests are presented here per channel. All channels were significantly higher than zero for the three languages.

**Table S12.** Group mean phase-coherence values for the permuted data at 6 months.

| Channel | ENGLISH |           | FRENCH |           | SPANISH |           |
|---------|---------|-----------|--------|-----------|---------|-----------|
|         | Mean    | p-value   | mean   | p-value   | mean    | p-value   |
| F7      | 0.036   | p < 0.001 | 0.037  | p < 0.001 | 0.036   | p < 0.001 |
| F3      | 0.036   | p < 0.001 | 0.037  | p < 0.001 | 0.036   | p < 0.001 |
| Fz      | 0.036   | p < 0.001 | 0.037  | p < 0.001 | 0.036   | p < 0.001 |
| F4      | 0.036   | p < 0.001 | 0.037  | p < 0.001 | 0.036   | p < 0.001 |
| F8      | 0.036   | p < 0.001 | 0.037  | p < 0.001 | 0.036   | p < 0.001 |
| T7      | 0.036   | p < 0.001 | 0.037  | p < 0.001 | 0.036   | p < 0.001 |
| C3      | 0.036   | p < 0.001 | 0.037  | p < 0.001 | 0.036   | p < 0.001 |
| Cz      | 0.036   | p < 0.001 | 0.037  | p < 0.001 | 0.036   | p < 0.001 |
| C4      | 0.036   | p < 0.001 | 0.037  | p < 0.001 | 0.036   | p < 0.001 |
| T8      | 0.036   | p < 0.001 | 0.037  | p < 0.001 | 0.036   | p < 0.001 |

*Note:* The phase-coherence distributions for the measured EEG data were submitted to paired samples t-tests to compare them to the phase-coherence distributions for the permuted data. The p-values for the permuted data were derived as the number of permutations out of the 1000 whose phase-coherence distributions were not significantly different from those obtained for the measured data. Phase-coherence distributions for the measured data were significantly higher than those for the permuted data for all channels in the three languages.



**Table S13.** Repeated measures ANOVAs of phase tracking results evaluating the effect of block order at 6 months.

| Channel | F-value | Corrected p-value |
|---------|---------|-------------------|
| F7      | 0.293   | 1.000             |
| F3      | 0.309   | 1.000             |
| Fz      | 0.356   | 1.000             |
| F4      | 1.043   | 1.000             |
| F8      | 2.414   | 1.000             |
| T7      | 0.286   | 1.000             |
| C3      | 0.189   | 1.000             |
| Cz      | 0.328   | 1.000             |
| C4      | 0.003   | 0.997             |
| T8      | 0.106   | 1.000             |

*Note:* The phase tracking results were classified according to their order of presentation (1<sup>st</sup> block, 2<sup>nd</sup> block, 3<sup>rd</sup> block), and submitted to repeated measures ANOVAs to evaluate whether they varied across blocks in each channel. There were no significant differences across blocks. The p-values were subjected to False Discovery Rate correction for multiple comparisons (Benjamini & Hochberg, 1995).

## SI References

- Benjamini, Y., & Hochberg, Y. (1995). Controlling the false discovery rate: a practical and powerful approach to multiple testing. *Journal of the Royal Statistical Society: series B (Methodological)* **57**(1), 289-300.
- Varnet, L., Ortiz-Barajas, M. C., Erra, R. G., Gervain, J., & Lorenzi, C. (2017). A cross-linguistic study of speech modulation spectra. *The Journal of the Acoustical Society of America* **142**, 1976-1989.
